# Supplementary material for: Single-nucleotide polymorphism rs4664308 in PLA2R1 gene is associated with the risk of idiopathic membranous nephropathy: a meta-analysis
Source: PubMed Central journal article supplement (PMC7403323; doi:10.1038/s41598-020-70009-x), 2020-08-04
Supplement: 41598_2020_70009_MOESM1_ESM.pdf [file 41598_2020_70009_MOESM1_ESM.pdf]

Single-nucleotide polymorphism rs4664308 in PLA2R1 gene is associated with the risk of idiopathic membranous nephropathy: A meta-analysis.

Masahiro Yoshikawa<sup>1,\*</sup> and Kensuke Asaba<sup>2</sup>

1. Division of Laboratory Medicine, Department of Pathology and Microbiology, Nihon University School of Medicine.

2. Department of Computational Diagnostic Radiology and Preventive Medicine, The University of Tokyo Hospital.

\*Corresponding author; myosh-ky@umin.ac.jp

| Author<br>Year         | Population or<br>ethnicity     | Genotyping            | cases<br>/controls | Genotypes of cases |    |    |       | Genotypes of controls |     |    |       | HWE for<br>controls      | NOS |
|------------------------|--------------------------------|-----------------------|--------------------|--------------------|----|----|-------|-----------------------|-----|----|-------|--------------------------|-----|
|                        |                                |                       |                    | CC                 | CT | TT | MAF   | CC                    | CT  | TT | MAF   |                          |     |
| Kaga<br>2014           | Japanese                       | Applied<br>Biosystems | 58/50              | 36                 | 18 | 4  | 0.241 | 23                    | 19  | 8  | 0.350 | 0.244                    | 6   |
| Kim<br>2011            | Korean                         | Applied<br>Biosystems | 132/132            | 84                 | 44 | 4  | 0.195 | 70                    | 45  | 17 | 0.299 | <b>excluded</b><br>0.031 | 8   |
| Ramachandran<br>2016   | Indian                         | Applied<br>Biosystems | 94/95              | 75                 | 16 | 3  | 0.117 | 59                    | 29  | 7  | 0.226 | 0.211                    | 7   |
| Tian - Group A<br>2019 | Han in Southern<br>China       | Applied<br>Biosystems | 166/144            | 102                | 52 | 12 | 0.229 | 77                    | 51  | 16 | 0.288 | 0.101                    | 8   |
| Tian - Group B<br>2019 | Han in North-<br>western China | Applied<br>Biosystems | 212/162            | 129                | 62 | 21 | 0.245 | 84                    | 58  | 20 | 0.302 | 0.054                    | 8   |
| Wang<br>2019           | Han in<br>Western China        | Applied<br>Biosystems | 314/354            | 219                | 81 | 14 | 0.174 | 209                   | 125 | 20 | 0.233 | 0.818                    | 8   |

**Supplementary Table S1. Characteristics and rs3828323 C>T genotype distributions (expressed in numbers) between the case and control groups in the included studies.** Abbreviations: HWE= Hardy–Weinberg equilibrium; MAF=minor allele frequency; NOS= Newcastle-Ottawa scale.

| Author<br>Year         | Population or<br>ethnicity     | Genotyping            | cases<br>/controls | Genotypes of cases |     |     |       | Genotypes of controls |     |    |       | HWE for<br>controls      | NOS |
|------------------------|--------------------------------|-----------------------|--------------------|--------------------|-----|-----|-------|-----------------------|-----|----|-------|--------------------------|-----|
|                        |                                |                       |                    | GG                 | CG  | CC  | MAF   | GG                    | CG  | CC | MAF   |                          |     |
| Kaga<br>2018           | Japanese                       | Applied<br>Biosystems | 58/50              | 35                 | 18  | 5   | 0.241 | 16                    | 15  | 19 | 0.530 | <b>excluded</b><br>0.005 | 6   |
| Kim<br>2011            | Korean                         | Applied<br>Biosystems | 132/132            | 9                  | 27  | 96  | 0.830 | 13                    | 52  | 67 | 0.705 | 0.537                    | 8   |
| Ramachandran<br>2016   | Indian                         | Applied<br>Biosystems | 94/95              | 74                 | 18  | 2   | 0.117 | 49                    | 41  | 5  | 0.268 | 0.335                    | 7   |
| Saeed<br>2014          | Caucasians                     | Life<br>Technologies  | 279/337            | 160                | 91  | 28  | 0.263 | 89                    | 166 | 82 | 0.490 | 0.791                    | 6   |
| Liu<br>2010            | Taiwanese-<br>Chinese          | Applied<br>Biosystems | 129/106            | 90                 | 37  | 2   | 0.159 | 58                    | 40  | 8  | 0.264 | 0.763                    | 7   |
| Lv<br>2013             | Han                            | Applied<br>Biosystems | 1112/1020          | 801                | 278 | 33  | 0.155 | 486                   | 453 | 81 | 0.301 | 0.082                    | 7   |
| Tian - Group A<br>2019 | Han in Southern<br>China       | Applied<br>Biosystems | 166/144            | 9                  | 56  | 101 | 0.777 | 15                    | 61  | 68 | 0.684 | 0.810                    | 8   |
| Tian - Group B<br>2019 | Han in North-<br>western China | Applied<br>Biosystems | 212/162            | 10                 | 65  | 137 | 0.800 | 10                    | 72  | 80 | 0.716 | 0.237                    | 8   |
| Wang<br>2019           | Han in<br>Western China        | Applied<br>Biosystems | 314/354            | 227                | 78  | 9   | 0.153 | 178                   | 140 | 36 | 0.299 | 0.280                    | 8   |

**Supplementary Table S2. Characteristics and rs35771982 G>C genotype distributions (expressed in numbers) between the case and control groups in the included studies.** Abbreviations: HWE= Hardy–Weinberg equilibrium; MAF=minor allele frequency; NOS=Newcastle-Ottawa scale.

| Author<br>Year         | Population or<br>ethnicity     | Genotyping            | cases<br>/controls | Genotypes of cases |     |    |       | Genotypes of controls |     |    |       | HWE for<br>controls      | NOS |
|------------------------|--------------------------------|-----------------------|--------------------|--------------------|-----|----|-------|-----------------------|-----|----|-------|--------------------------|-----|
|                        |                                |                       |                    | TT                 | CT  | CC | MAF   | TT                    | CT  | CC | MAF   |                          |     |
| Kaga<br>2014           | Japanese                       | Applied<br>Biosystems | 58/50              | 31                 | 22  | 5  | 0.276 | 15                    | 16  | 19 | 0.540 | <b>excluded</b><br>0.012 | 6   |
| Lv<br>2013             | Han                            | Applied<br>Biosystems | 1112/1020          | 801                | 276 | 35 | 0.156 | 489                   | 451 | 80 | 0.300 | 0.086                    | 7   |
| Ramachandran<br>2016   | Indian                         | Applied<br>Biosystems | 94/95              | 32                 | 51  | 11 | 0.388 | 43                    | 38  | 14 | 0.347 | 0.251                    | 7   |
| Tian - Group A<br>2019 | Han in Southern<br>China       | Applied<br>Biosystems | 166/144            | 95                 | 59  | 12 | 0.250 | 65                    | 57  | 22 | 0.351 | 0.116                    | 8   |
| Tian - Group B<br>2019 | Han in North-<br>western China | Applied<br>Biosystems | 217/162            | 134                | 61  | 17 | 0.224 | 77                    | 64  | 21 | 0.327 | 0.191                    | 8   |

**Supplementary Table S3. Characteristics and rs3749117 T>C genotype distributions (expressed in numbers) between the case and control groups in the included studies.** Abbreviations: HWE= Hardy–Weinberg equilibrium; MAF=minor allele frequency; NOS= Newcastle-Ottawa scale.

| Author<br>Year         | Population or<br>ethnicity     | Genotyping            | cases<br>/controls | Genotypes of cases |    |    |       | Genotypes of controls |     |    |       | HWE for<br>controls       | NOS |
|------------------------|--------------------------------|-----------------------|--------------------|--------------------|----|----|-------|-----------------------|-----|----|-------|---------------------------|-----|
|                        |                                |                       |                    | CC                 | CT | TT | MAF   | CC                    | CT  | TT | MAF   |                           |     |
| Kaga<br>2014           | Japanese                       | Applied<br>Biosystems | 58/50              | 29                 | 26 | 3  | 0.276 | 15                    | 29  | 6  | 0.410 | 0.160                     | 6   |
| Ramachandran<br>2016   | Indian                         | Applied<br>Biosystems | 94/95              | 80                 | 6  | 8  | 0.117 | 55                    | 21  | 19 | 0.311 | <b>excluded</b><br><0.001 | 7   |
| Tian - Group A<br>2019 | Han in Southern<br>China       | Applied<br>Biosystems | 166/144            | 86                 | 66 | 14 | 0.283 | 65                    | 62  | 17 | 0.333 | 0.708                     | 8   |
| Tian - Group B<br>2019 | Han in North-<br>western China | Applied<br>Biosystems | 212/162            | 130                | 70 | 12 | 0.222 | 87                    | 65  | 10 | 0.262 | 0.641                     | 8   |
| Wang<br>2019           | Han in<br>Western China        | Applied<br>Biosystems | 314/354            | 232                | 73 | 9  | 0.145 | 181                   | 133 | 40 | 0.301 | <b>excluded</b><br>0.044  | 8   |

**Supplementary Table S4. Characteristics and rs3749119 C>T genotype distributions (expressed in numbers) between the case and control groups in the included studies.** Abbreviations: HWE= Hardy–Weinberg equilibrium; MAF=minor allele frequency; NOS= Newcastle
