# Supplementary material for: Single-nucleotide polymorphism rs4664308 in PLA2R1 gene is associated with the risk of idiopathic membranous nephropathy: a meta-analysis
Source: PubMed Central journal article supplement (PMC7403323; doi:10.1038/s41598-020-70009-x), 2020-08-04
Supplement: 41598_2020_70009_MOESM2_ESM.pdf [file 41598_2020_70009_MOESM2_ESM.pdf]

# Single-nucleotide polymorphism rs4664308 in PLA2R1 gene is associated with the risk of idiopathic membranous nephropathy: A meta-analysis.

Masahiro Yoshikawa<sup>1,\*</sup> and Kensuke Asaba<sup>2</sup>

1. Division of Laboratory Medicine, Department of Pathology and Microbiology, Nihon University School of Medicine.

2. Department of Computational Diagnostic Radiology and Preventive Medicine, The University of Tokyo Hospital.

\*Corresponding author; myosh-tky@umin.ac.jp

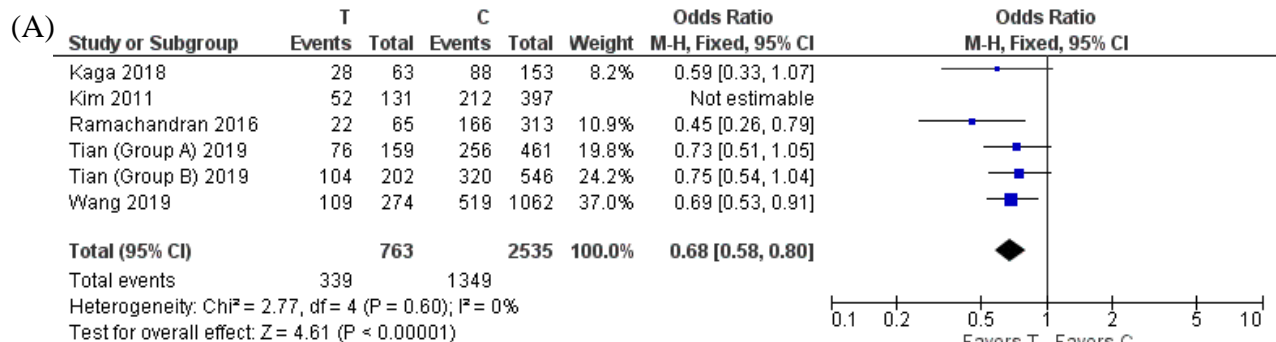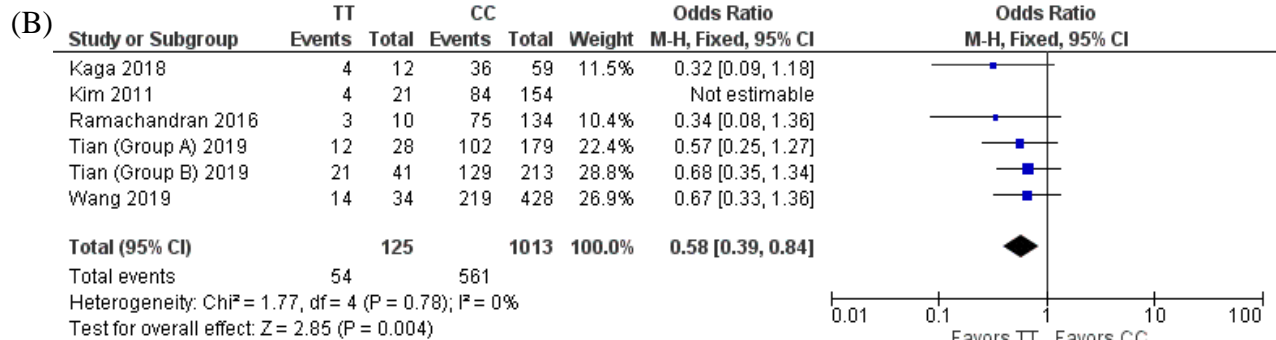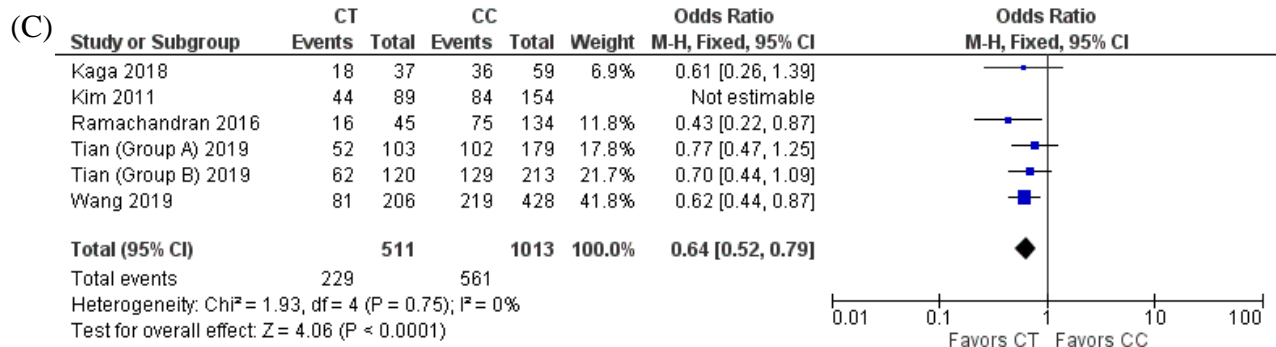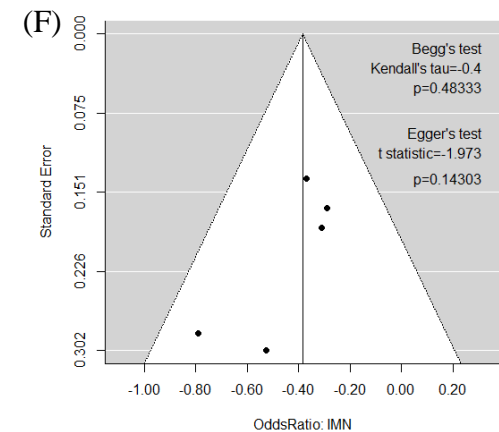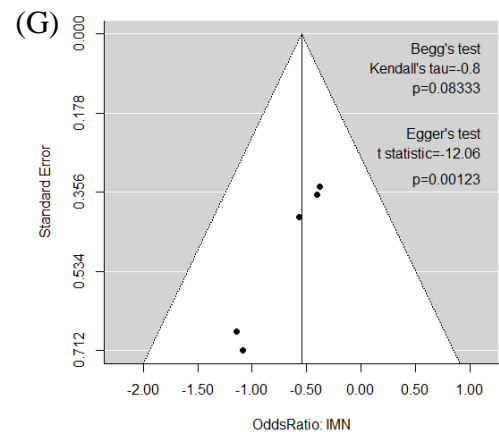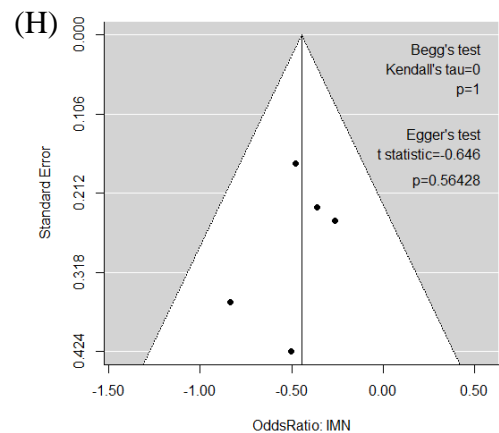

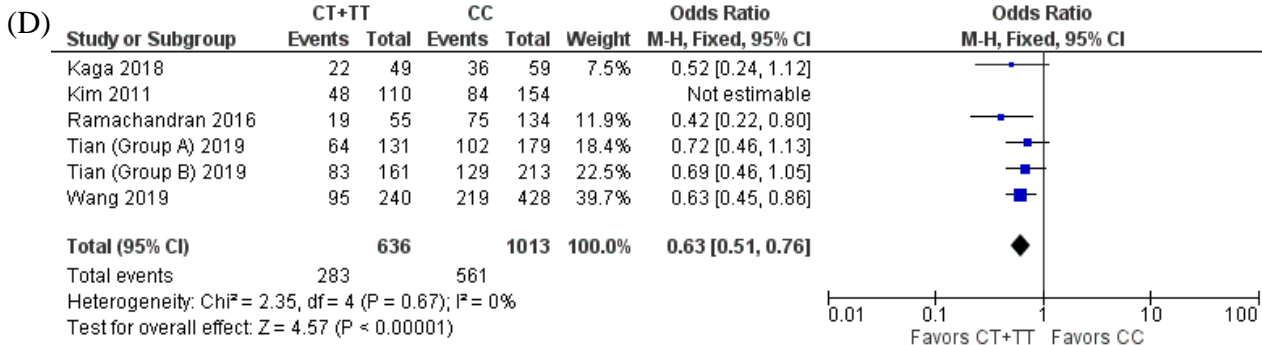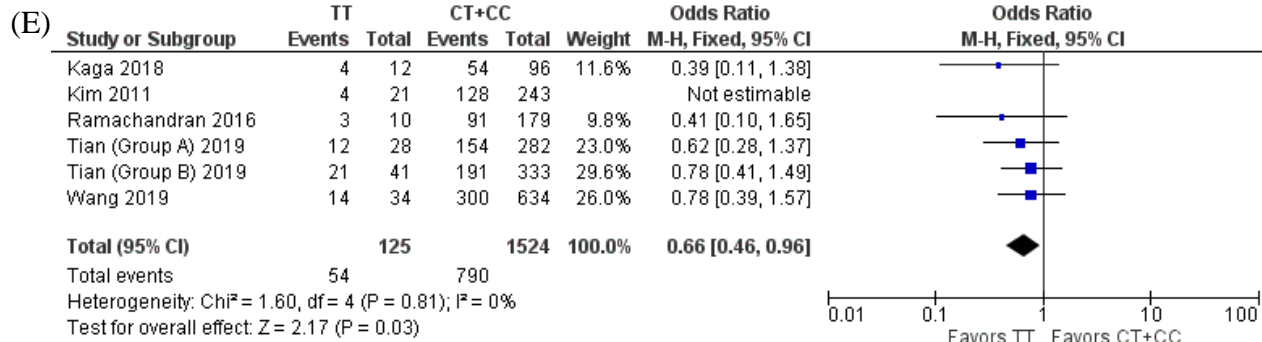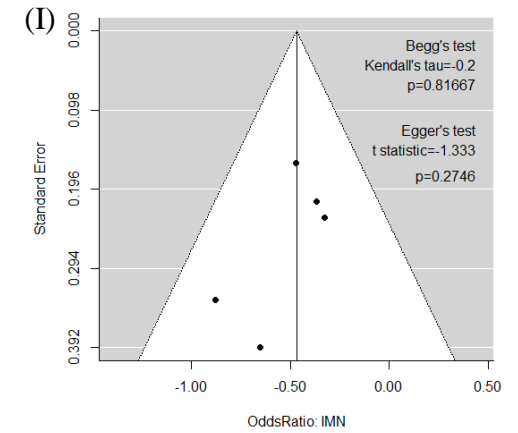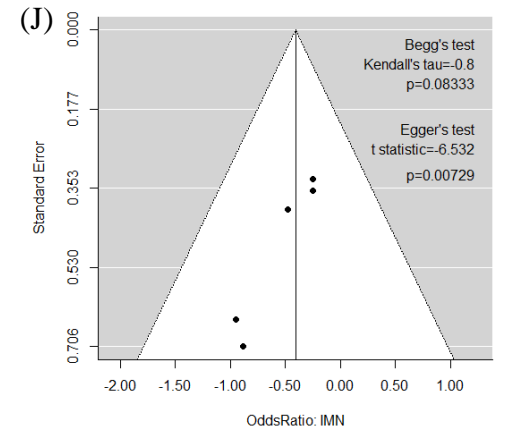

## Supplementary Figure S1

Forest plot of the risk of IMN associated with rs3828323 under the (A) allelic model (T vs. C), (B) additive model (TT vs. CC), (C) additive model (CT vs. CC), (D) dominant model (CT+TT vs. CC), and (E) recessive model (TT vs. CT+CC). (F-J) Funnel plot, Begg's test and Egger's test for (A-E), respectively. Note that the log (OR) is plotted on the horizontal axis.

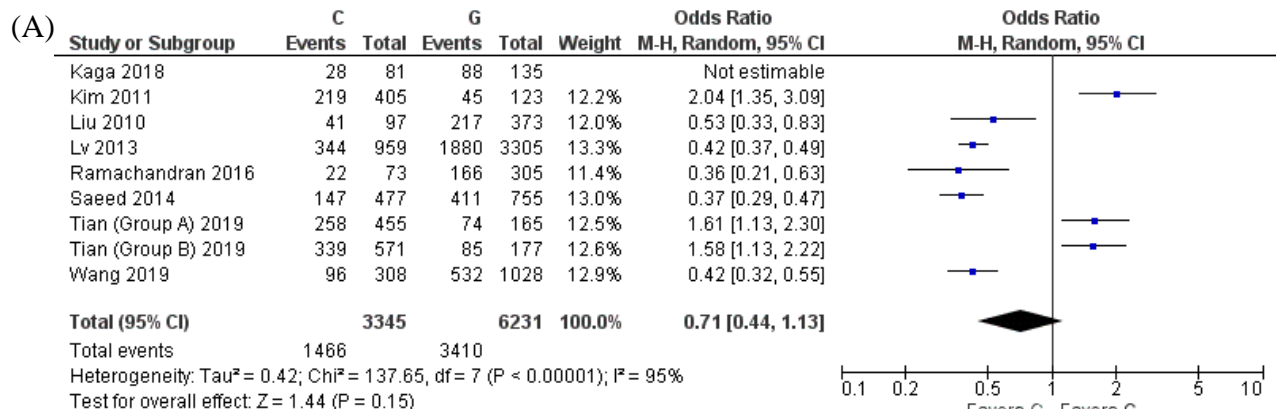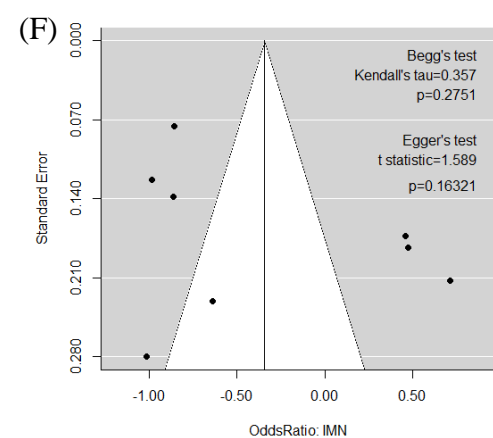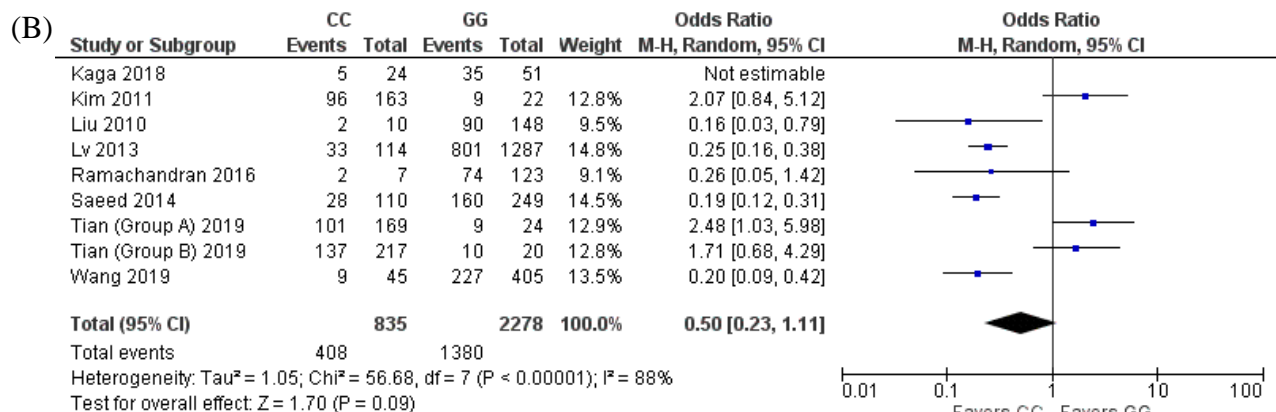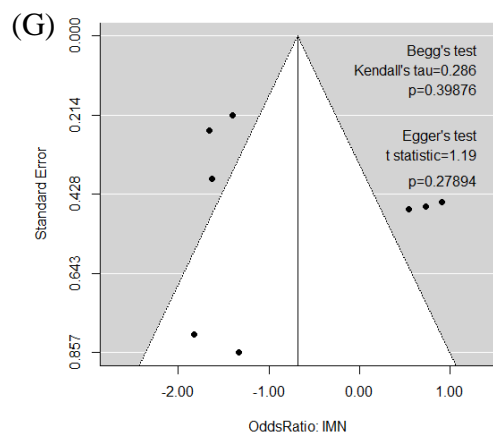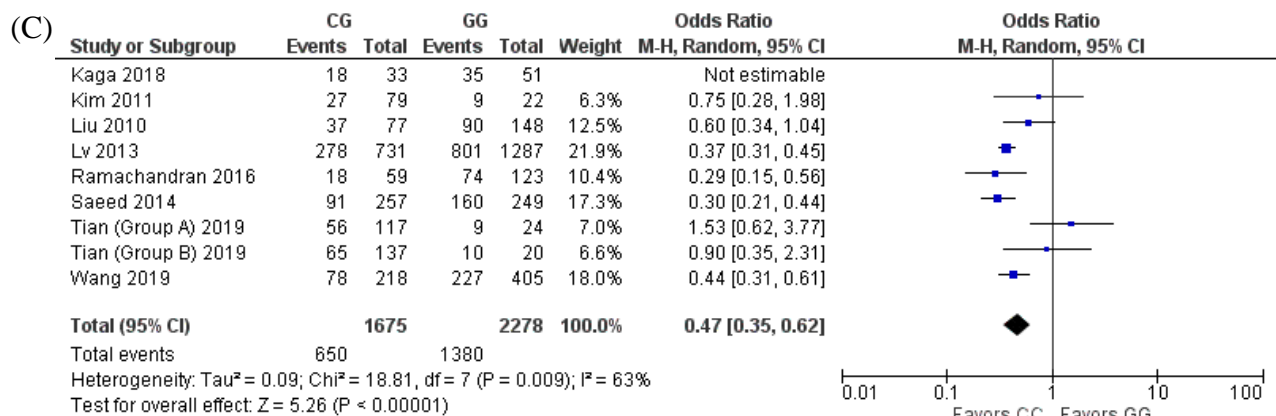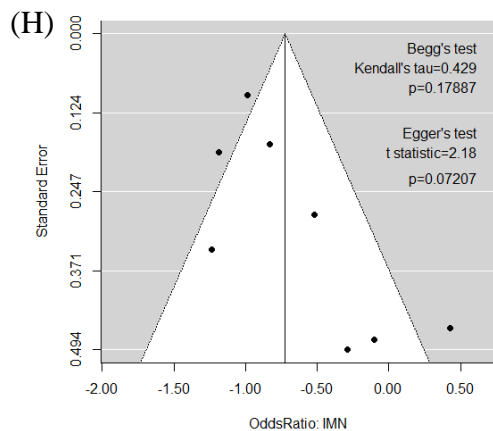

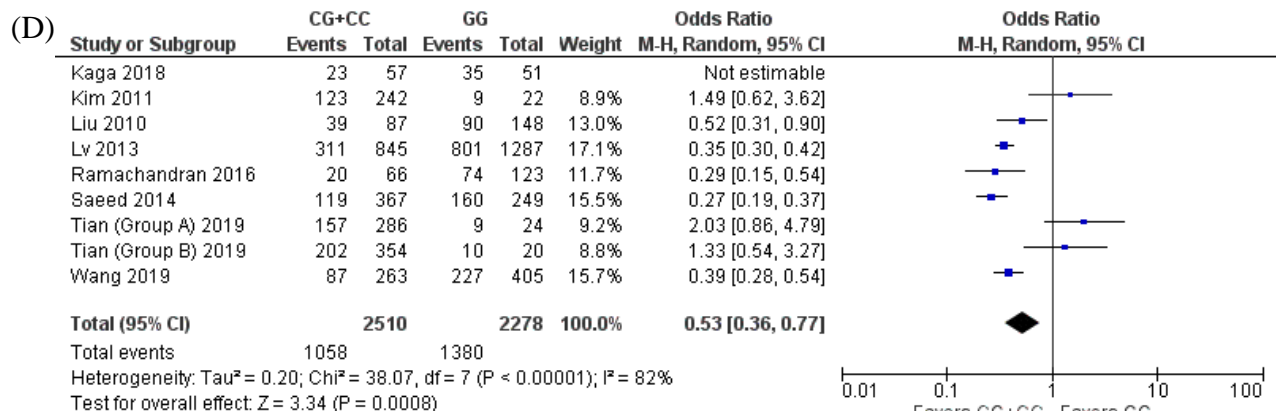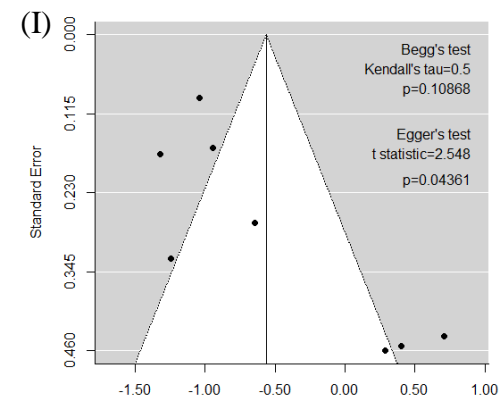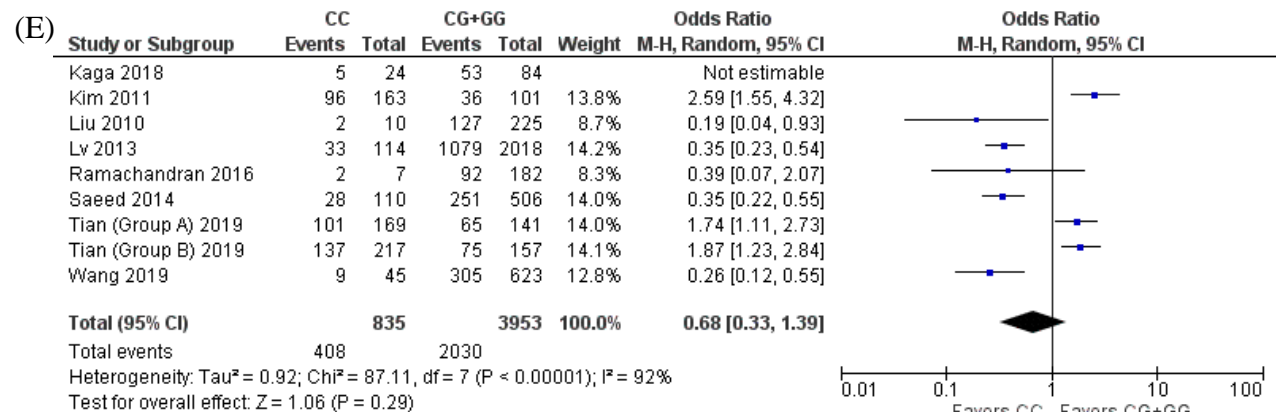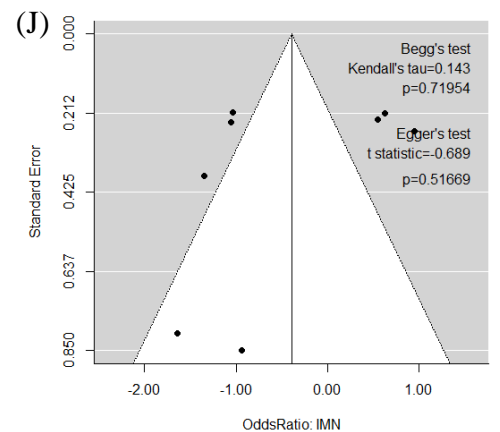

## Supplementary Figure S2

Forest plot of the risk of IMN associated with rs35771982 under the (A) allelic model (C vs. G), (B) additive model (CC vs. GG), (C) additive model (CG vs. GG), (D) dominant model (CG+CC vs. GG), and (E) recessive model (CC vs. CG+GG). (F-J) Funnel plot, Begg's test and Egger's test for (A-E), respectively. Note that the log (OR) is plotted on the horizontal axis.

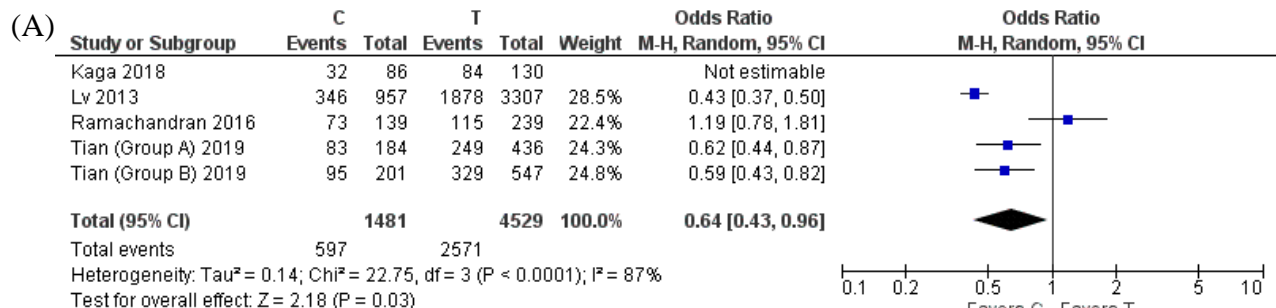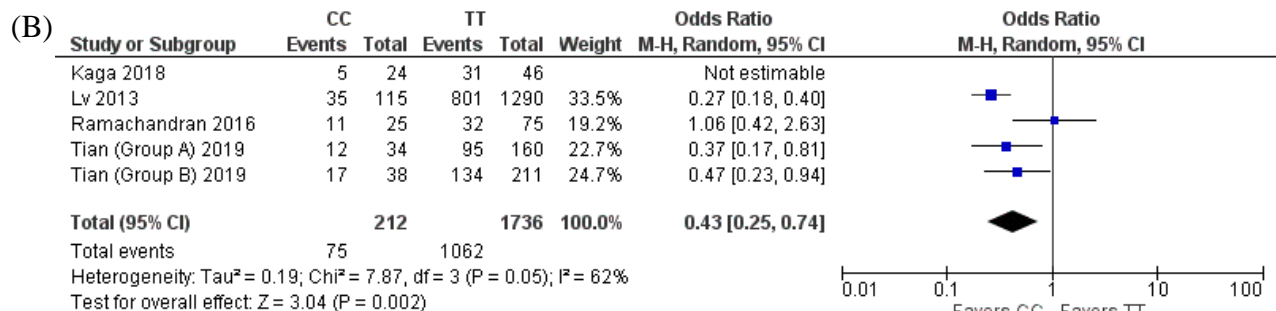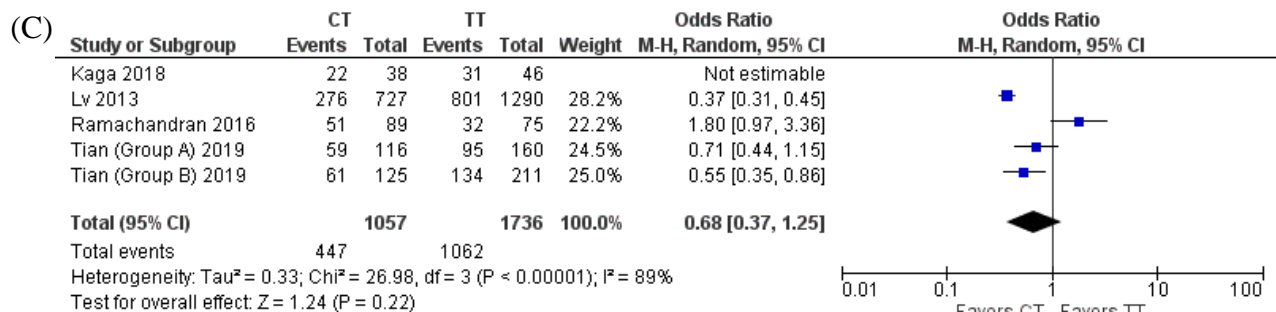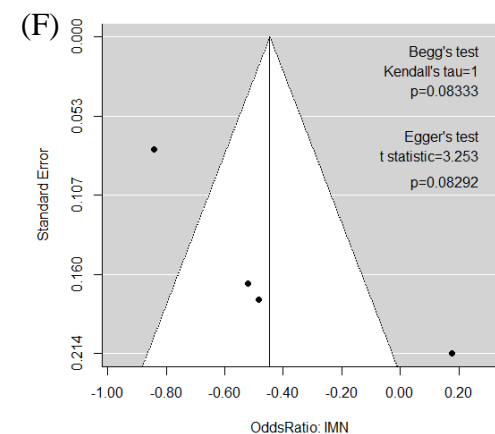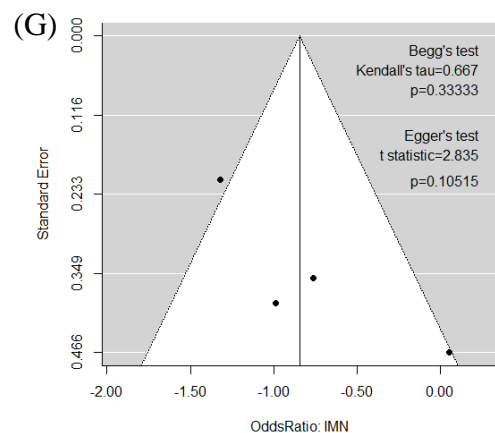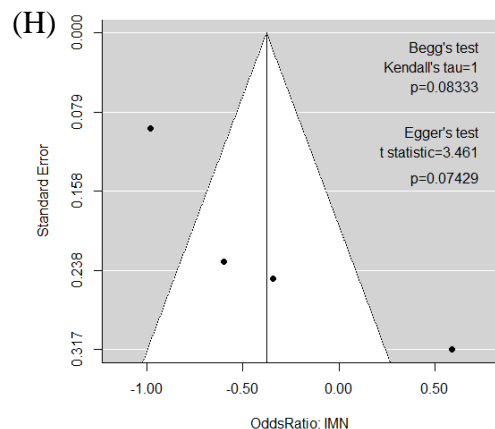

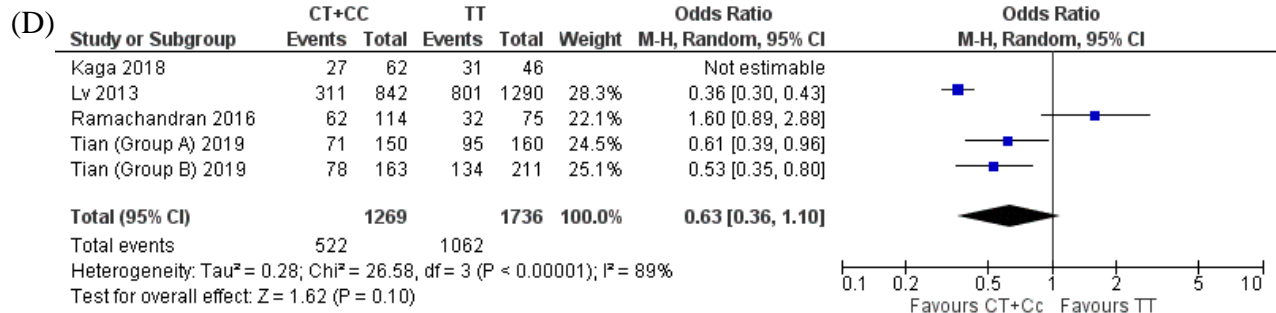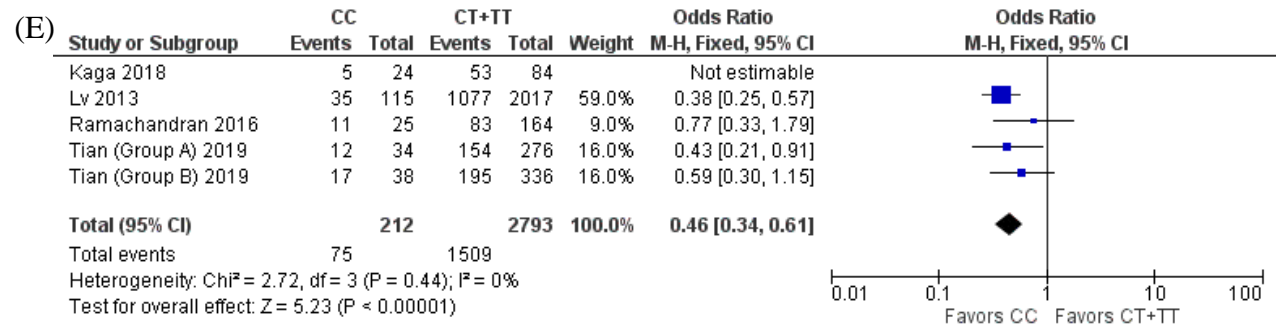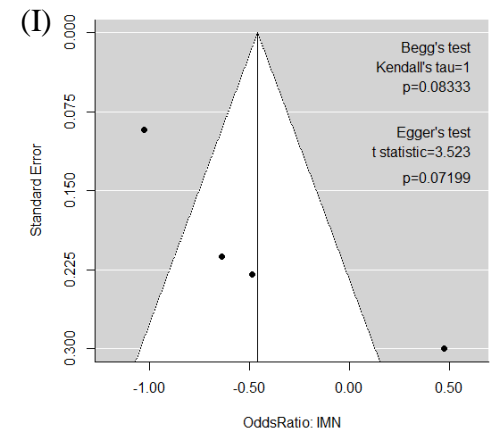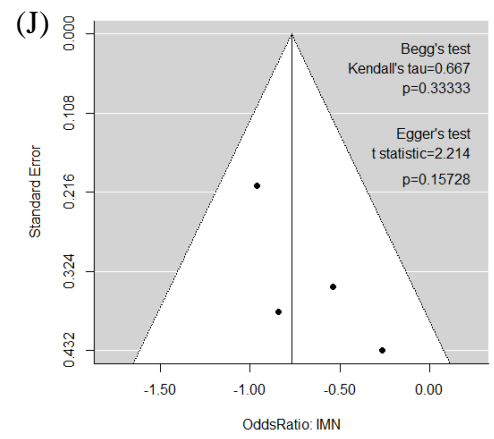

### Supplementary Figure S3

Forest plot of the risk of IMN associated with rs3749117 under the (A) allelic model (C vs. T), (B) additive model (CC vs. TT), (C) additive model (CT vs. TT), (D) dominant model (CT+CC vs. TT), and (E) recessive model (CC vs. CT+TT). (F-J) Funnel plot, Begg's test and Egger's test for (A-E), respectively. Note that the log (OR) is plotted on the horizontal axis.

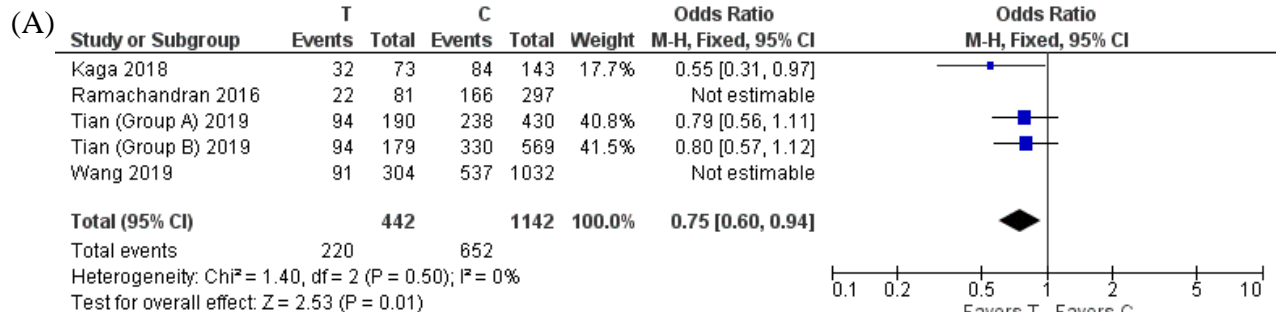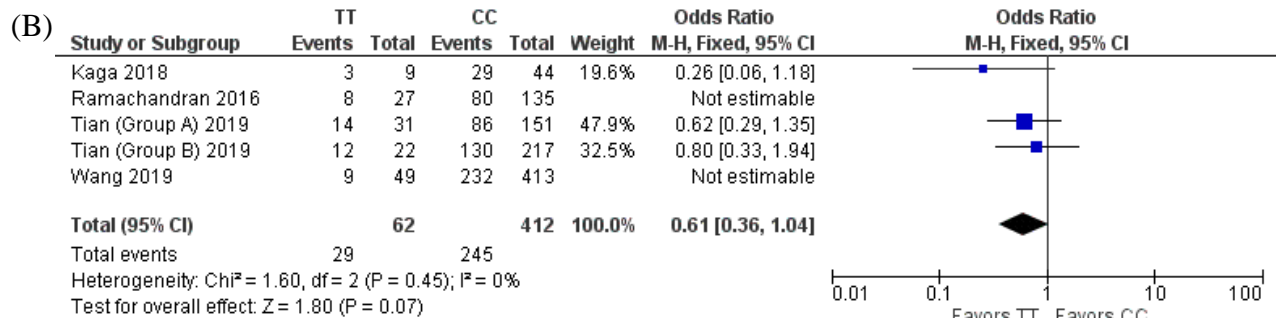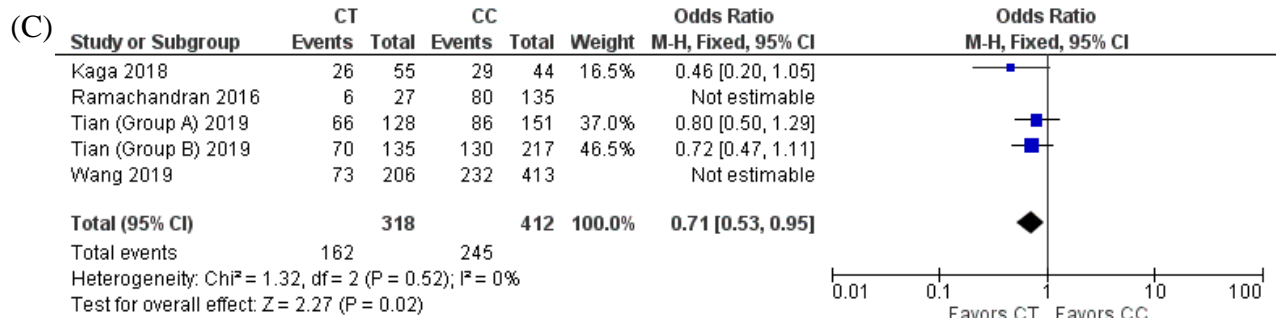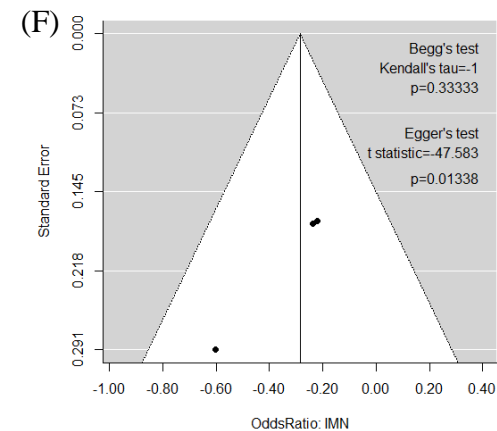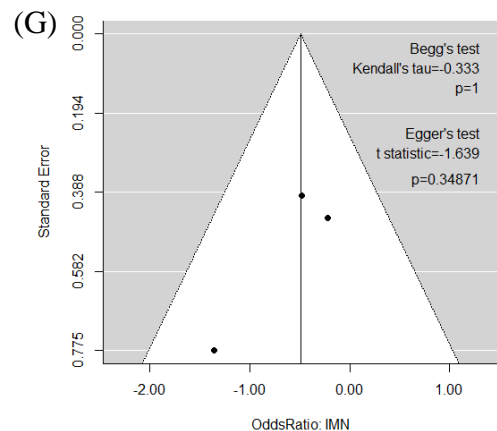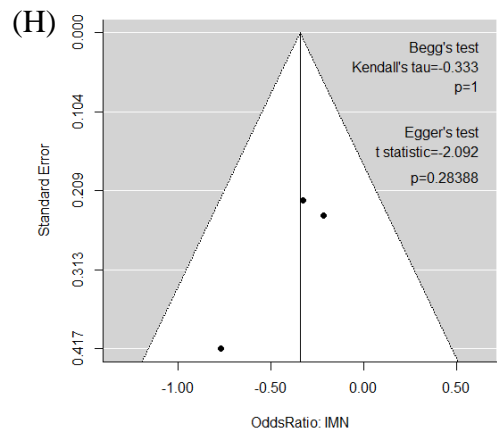



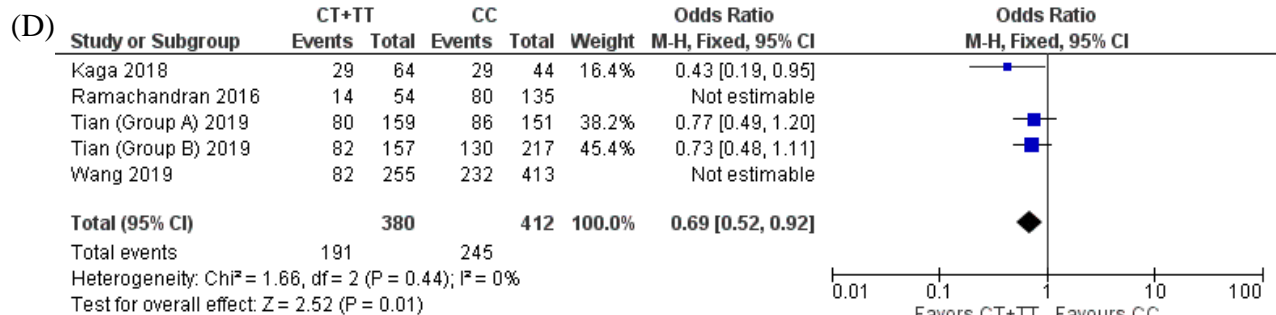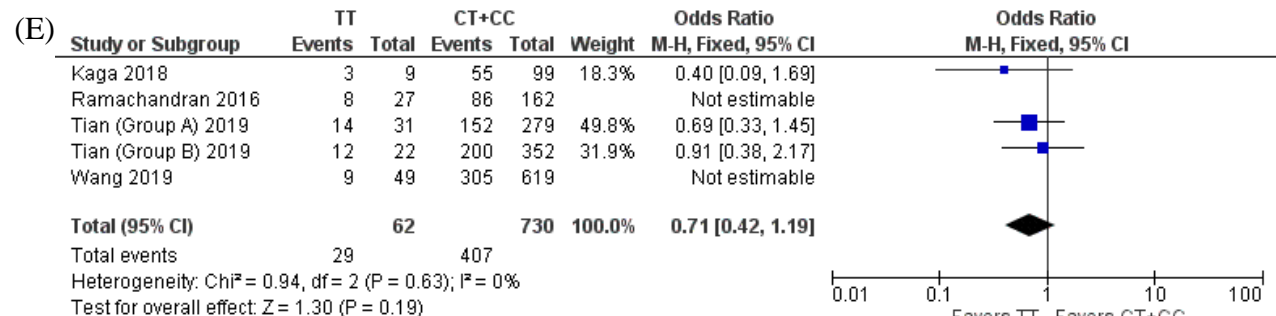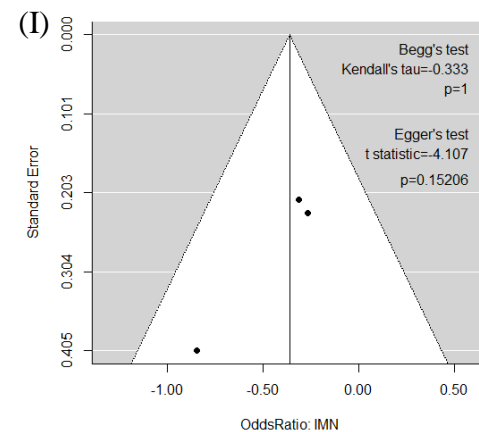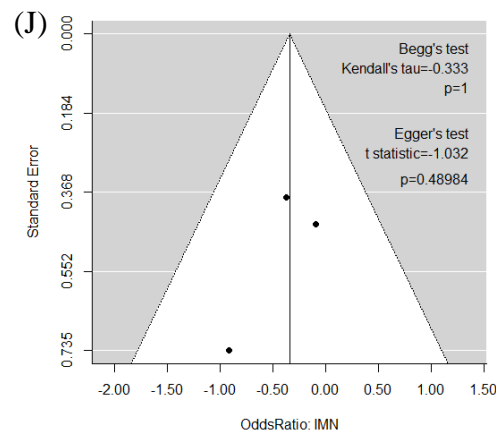

### Supplementary Figure S4

Forest plot of the risk of IMN associated with rs3749119 under the (A) allelic model (T vs. C), (B) additive model (TT vs. CC), (C) additive model (CT vs. CC), (D) dominant model (CT+TT vs. CC), and (E) recessive model (TT vs. CT+CC). (F-J) Funnel plot, Begg's test and Egger's test for (A-E), respectively. Note that the log (OR) is plotted on the horizontal axis.
